# Supplementary material
Source: PubMed Central journal article supplement (PMC5013807)

**Supplementary Material 1:** List of species included in the analysis, their respective ecology, and the number of specimens scanned per species (N).

| Species                       | Ecology | Specimen number and origin collection                                                                | N | References     |
|-------------------------------|---------|------------------------------------------------------------------------------------------------------|---|----------------|
| <i>Acrochordus granulatus</i> | Aquatic | 0000.7200, MNHN; 0000.5196, MNHN; 0000.7201, MNHN; 0000.6155, MNHN; 1900.0356, MNHN; 1900.0357, MNHN | 6 | 1–4            |
| <i>Acrochordus javanicus</i>  | Aquatic | 0000.3294, MNHN; MS45, Anthony Herrel; MS52, Anthony Herrel; 0000.5370, MNHN; 0000.1145, MNHN        | 5 | 4–6            |
| <i>Afronatrix anoscopus</i>   | Aquatic | 1921.0391, MNHN; 1916.0215A, MNHN; 1960.0139, MNHN; 1943.0079, MNHN; 1951.0008, MNHN                 | 5 | 7,8            |
| <i>Agkistrodon piscivorus</i> | Aquatic | 0000.4252, MNHN; R3979, AMNH; R46913, AMNH; R50493, AMNH; R64620, AMNH                               | 5 | 9–12           |
| <i>Aipysurus fuscus</i>       | Aquatic | R23488, MCZ; R23485, MCZ; R23483, MCZ; R23482, MCZ; R23481, MCZ                                      | 5 | 13             |
| <i>Aipysurus laevis</i>       | Aquatic | 1990.4513, MNHN; 1990.4507, MNHN; 1990.4514, MNHN; 1990.4515, MNHN; 1999.6566, MNHN                  | 5 | 13             |
| <i>Atretium schistosum</i>    | Aquatic | 0000.3519, MNHN; 1946.0064, MNHN; 0000.7000, MNHN; 1999.8089, MNHN; 0000.7414, MNHN                  | 5 | 14–16          |
| <i>Bitia hydroides</i>        | Aquatic | 229793, FMNH; 229795, FMNH; 198701, FMNH; 229791, FMNH; 211898, CAS; 211899, CAS; 211902, CAS        | 7 | 17–20          |
| <i>Cantoria violacea</i>      | Aquatic | 206912, FMNH; 250116, FMNH; 250118, FMNH; 204970, CAS; 204971, CAS; 211909, CAS                      | 7 | 17,21          |
| <i>Cerberus rynchops</i>      | Aquatic | 1996.0258, MNHN; 1900.0417, MNHN; 1946.0078, MNHN; 1946.0078A, MNHN; 1946.0077, MNHN                 | 5 | 17,21–23       |
| <i>Cylindrophis ruffus</i>    | Aquatic | 0000.3280, MNHN; 2007.2452, MNHN; 0000.0440, MNHN; 0000.3281, MNHN; 0000.6362, MNHN                  | 5 | 24,25          |
| <i>Enhydris bocourti</i>      | Aquatic | 1988.3768, MNHN; 1970.0556, MNHN; 1970.0558, MNHN; 1970.0559, MNHN; 1885.0333, MNHN                  | 5 | 17,26          |
| <i>Enhydris chinensis</i>     | Aquatic | 1911.0014, MNHN; 1911.0015, MNHN; 0000.8777, MNHN; 0000.8778, MNHN; 1906.0217, MNHN                  | 5 | 17,21,27–29    |
| <i>Enhydris enhydris</i>      | Aquatic | 0000.3749, MNHN; 0000.5567, MNHN; 1970.0544, MNHN; 1970.0550, MNHN; 0000.5528, MNHN                  | 5 | 17,21,26,30,31 |
| <i>Ephalophis greyae</i>      | Aquatic | 212348, FMNH; 212362, FMNH; 212351, FMNH; 212361, FMNH; 212367, FMNH                                 | 5 | 32,33          |

|                                |         |                                                                                                      |   |                |
|--------------------------------|---------|------------------------------------------------------------------------------------------------------|---|----------------|
| <i>Erpeton tentaculatum</i>    | Aquatic | 1970.0564, MNHN; 1970.0568, MNHN; 0000.5458, MNHN; 0000.0924, MNHN; 0000.0924A, MNHN                 | 5 | 17,34          |
| <i>Erythrolamprus miliaris</i> | Aquatic | 15426, FMNH; 15427, FMNH; 15432, FMNH; 15433, FMNH; 217389, FMNH                                     | 5 | 35             |
| <i>Eunectes murinus</i>        | Aquatic | 0000.7190, MNHN; 1996.7897, MNHN; 1996.7898, MNHN; 1994.1539, MNHN; 1994.1538, MNHN                  | 5 | 35             |
| <i>Farancia erythrogramma</i>  | Aquatic | 1903.0325, MNHN; 0000.3397, MNHN; 1991.1666, MNHN; 0000.3396, MNHN; R128620, AMNH                    | 5 | 36–38          |
| <i>Fordonia leucobalia</i>     | Aquatic | 1974.1331, MNHN; 1885.0128, MNHN; 1892.0270, MNHN; 1885.0545, MNHN; 217450, FMNH; 218887, FMNH       | 6 | 17,21,31,39–41 |
| <i>Gerarda prevostiana</i>     | Aquatic | 1946.0079, MNHN; 1946.0271, MNHN; 204972, CAS; 211971, CAS                                           | 4 | 17,21,41,42    |
| <i>Grayia ornata</i>           | Aquatic | 1996.6644, MNHN; 1995.9679, MNHN; 1994.3383, MNHN; 1994.8079, MNHN; 1995.9672, MNHN                  | 5 | 7              |
| <i>Grayia smithii</i>          | Aquatic | 1998.0603, MNHN; 1995.3401, MNHN; 1996.6446, MNHN; 1994.3393, MNHN; 1995.3406, MNHN                  | 5 | 43             |
| <i>Grayia tholloni</i>         | Aquatic | 1996.6450, MNHN; 1996.6451, MNHN; 1988.2341, MNHN; 1988.2345, MNHN; 1994.8085, MNHN                  | 5 | 7              |
| <i>Helicops angulatus</i>      | Aquatic | 0000.3609, MNHN; 0000.1542, MNHN; 1997.2097, MNHN; 1997.2032, MNHN; 1997.2034, MNHN                  | 5 | 35             |
| <i>Helicops carinicaudus</i>   | Aquatic | 0000.5237, MNHN; 1887.0447, MNHN; 87097, CAS                                                         | 3 | 44             |
| <i>Homalopsis buccata</i>      | Aquatic | 1970.0516, MNHN; 1970.0518, MNHN; 1974.1333, MNHN; 1970.0517, MNHN; 1884.0123, MNHN                  | 5 | 17,20,45–47    |
| <i>Hydrelaps darwiniensis</i>  | Aquatic | R86165, AMNH; R86166, AMNH; R86167, AMNH; R86169, AMNH; R86172, AMNH                                 | 5 | 48,49          |
| <i>Hydrodynastes bicinctus</i> | Aquatic | 1974.0854, MNHN; 1889.0398, MNHN; 1902.0271, MNHN; 0000.8665, MNHN; R88401, AMNH                     | 5 | 35             |
| <i>Hydrodynastes gigas</i>     | Aquatic | 1989.3093, MNHN; 0000.A301, MNHN; 0000.A302, MNHN; 1997.2121, MNHN; 1999.8322, MNHN; 1997.2347, MNHN | 6 | 35             |
| <i>Hydrophis ornata</i>        | Aquatic | 0000.0851, MNHN; 1977.0807, MNHN; R66586, AMNH; R66588, AMNH; R161770, AMNH                          | 5 | 1              |
| <i>Hydrophis platura</i>       | Aquatic | 0000.5137, MNHN; 1922.0005, MNHN; 1922.0002, MNHN; 1994.0659, MNHN; 1893.0064, MNHN                  | 5 | 1,50,51        |

|                                      |         |                                                                                                  |   |          |
|--------------------------------------|---------|--------------------------------------------------------------------------------------------------|---|----------|
| <i>Hydrophis schistosa</i>           | Aquatic | 198586, FMNH; 202102, FMNH; 202103, FMNH; 199488, FMNH; 218842, FMNH                             | 5 | 1,13     |
| <i>Hydrophis spiralis</i>            | Aquatic | 0000.4260A, MNHN; 0000.4260, MNHN; 0000.3988, MNHN; 0000.7723, MNHN; R161772, AMNH               | 5 | 52       |
| <i>Hydrophis stokesii</i>            | Aquatic | 212320, FMNH; 213063, FMNH; 16774, CAS                                                           | 3 | 13       |
| <i>Hydrops triangularis</i>          | Aquatic | 1973.0296, MNHN; 0000.3438, MNHN; 1978.2500, MNHN; 1986.0565, MNHN; 1989.3052, MNHN              | 5 | 35       |
| <i>Laticauda colubrina</i>           | Aquatic | 0000.5180, MNHN; 0000.7702, MNHN; 0000.5881, MNHN; 0000.5766, MNHN; 0000.9053, MNHN              | 5 | 1,53–55  |
| <i>Lycodonomorphus laevisissimus</i> | Aquatic | R18223, AMNH; 156721, CAS                                                                        | 2 | 56       |
| <i>Lycodonomorphus rufulus</i>       | Aquatic | 205893, FMNH; 205889, FMNH; 0000.3377, MNHN; 0000.1210, MNHN; 0000.0563, MNHN                    | 5 | 57       |
| <i>Micrurus lemniscatus</i>          | Aquatic | 1897.0006, MNHN; 1989.3151, MNHN; 0000.7658, MNHN; 1996.7849, MNHN; 0000.0201, MNHN              | 5 | 35       |
| <i>Micrurus surinamensis</i>         | Aquatic | 1996.7874, MNHN; 1978.2312, MNHN; 0000.3926, MNHN; 1873, Antoine Fouquet; 1999.8313, MNHN        | 5 | 35       |
| <i>Myron richardsonii</i>            | Aquatic | R86236, AMNH; R111790, AMNH; R111792, AMNH; R111793, AMNH; 114105, CAS; 135489, CAS; 135491, CAS | 7 | 13       |
| <i>Naja annulata</i>                 | Aquatic | 1967.0455, MNHN; 1899.0294, MNHN; 1892.0098, MNHN; 1967.0452, MNHN; 0000.8222, MNHN              | 5 | 7        |
| <i>Natriciteres olivacea</i>         | Aquatic | 1896.0518, MNHN; 0000.6507A, MNHN; 1896.0520, MNHN; 0000.6508, MNHN; 1994.8215, MNHN             | 5 | 8,58,59  |
| <i>Natrix tessellata</i>             | Aquatic | 2000.5145, MNHN; 1989.0698, MNHN; 0000.0641, MNHN; 1884.0155, MNHN; 0000.0642, MNHN              | 5 | 60,61    |
| <i>Nerodia cyclopion</i>             | Aquatic | 0000.0121, MNHN; 0000.3482, MNHN; 1955.0058, MNHN; R159217, AMNH; R159218, AMNH                  | 5 | 62,63    |
| <i>Nerodia harteri</i>               | Aquatic | R64408, AMNH; R72686, AMNH; R72690, AMNH; R85314, AMNH; R162252, AMNH                            | 5 | 62,64–67 |
| <i>Opisthotropis lateralis</i>       | Aquatic | R172664, MCZ; R172665, MCZ; R175987, MCZ; R172654, MCZ; R172653, MCZ                             | 5 | 68       |
| <i>Psammodynastes pictus</i>         | Aquatic | 1891.0077, MNHN; 1891.0045, MNHN; 1891.0046, MNHN; 128402, FMNH; 148906, FMNH; 148926, FMNH      | 6 | 47       |

|                                 |             |                                                                                                   |   |          |
|---------------------------------|-------------|---------------------------------------------------------------------------------------------------|---|----------|
| <i>Pseudoeryx plicatilis</i>    | Aquatic     | 0000.3402, MNHN; 0000.3401, MNHN; 0000.3401A, MNHN; 1962.0423, MNHN; 1978.2550, MNHN              | 5 | 35,69    |
| <i>Pseudoferania polylepis</i>  | Aquatic     | R35067, MCZ; R140183, MCZ; R129135, MCZ; R141689, MCZ; 1937.0082, MNHN                            | 5 | 17,70    |
| <i>Regina grahami</i>           | Aquatic     | 29565, FMNH; 30428, FMNH; 7791, FMNH; 17033, FMNH; 17609, FMNH                                    | 5 | 62,71    |
| <i>Regina septemvittata</i>     | Aquatic     | 3074, FMNH; 35881, FMNH; 3076, FMNH; 3077, FMNH; 35880, FMNH; 0000.3492, MNHN                     | 6 | 72–74    |
| <i>Regina alleni</i>            | Aquatic     | 11047, FMNH; 22591, FMNH; 48360, FMNH; R159307, AMNH; R170180, AMNH                               | 5 | 75–77    |
| <i>Regina rigida</i>            | Aquatic     | 0000.1101, MNHN; R159322, AMNH; R159323, AMNH; R160211, AMNH; R162319, AMNH                       | 5 | 62,63,78 |
| <i>Seminatrix pygaea</i>        | Aquatic     | 53688, FMNH; 53693, FMNH; 53687, FMNH; 53691, FMNH; 95347, FMNH                                   | 5 | 79       |
| <i>Sinonatrix annularis</i>     | Aquatic     | 1902.0080, MNHN; 1989.0215, MNHN; 1989.0206, MNHN; 1999.9017, MNHN; 1999.9016, MNHN               | 5 | 80       |
| <i>Sinonatrix percarinata</i>   | Aquatic     | 1935.0449, MNHN; 1935.0449A, MNHN; 1812.0321, MNHN; 2007.2443, MNHN; 1812.0319, MNHN              | 5 | 80       |
| <i>Thamnophis atratus</i>       | Aquatic     | R57421, AMNH; R162404, AMNH; R162405, AMNH; 212664, CAS; 212709, CAS; 212720, CAS; 220684, CAS    | 7 | 81–85    |
| <i>Thamnophis couchii</i>       | Aquatic     | R57423, AMNH; R66544, AMNH; R108191, AMNH; R108192, AMNH; R108194, AMNH                           | 5 | 81,86    |
| <i>Thamnophis rufipunctatus</i> | Aquatic     | R64376, AMNH; R64402, AMNH; R68286, AMNH; R85996, AMNH; R162440, AMNH                             | 5 | 81,87–89 |
| <i>Xenochrophis piscator</i>    | Aquatic     | 1991.1628, MNHN; 0000.7323, MNHN; 1991.1627, MNHN; 1998.8543, MNHN; 1998.8553, MNHN; R34085, AMNH | 6 | 28,90,91 |
| <i>Achalinus rufescens</i>      | Non-aquatic | 1935.0439, MNHN; 1935.0441, MNHN; 1935.0051A, MNHN; 1935.0051B, MNHN; 1935.0440, MNHN             | 5 | 92       |
| <i>Agkistrodon contortrix</i>   | Non-aquatic | 1996.2762, MNHN; 0000.0884, MNHN; 1973.0072, MNHN; 1973.0077, MNHN; 0000.1762, MNHN               | 5 | 93       |
| <i>Boaedon lineatus</i>         | Non-aquatic | 1988.2109, MNHN; 1994.8159, MNHN; 1994.8131, MNHN; 1994.8134, MNHN; 1990.4591, MNHN               | 5 | 94       |
| <i>Bungarus caeruleus</i>       | Non-aquatic | 0000.4259, MNHN; 2007.2454, MNHN; 1962.0237, MNHN; 1962.0238, MNHN; 0000.3952, MNHN               | 5 | 95       |

|                                  |             |                                                                                                      |   |         |
|----------------------------------|-------------|------------------------------------------------------------------------------------------------------|---|---------|
| <i>Diadophis punctatus</i>       | Non-aquatic | 0000.8593, MNHN; 1894.0061, MNHN; 1894.0062, MNHN; 0000.3379, MNHN; 0000.3379A, MNHN                 | 5 | 96      |
| <i>Echiopsis curta</i>           | Non-aquatic | 0000.0951, MNHN; 0000.7675, MNHN                                                                     | 2 | 97      |
| <i>Epicrates cenchria</i>        | Non-aquatic | 1955.0037, MNHN; 1991.1492, MNHN; 0000.3335, MNHN; 1973.1196, MNHN; 0000.3291, MNHN                  | 5 | 98      |
| <i>Erythrolamprus aesculapii</i> | Non-aquatic | 1978.2515, MNHN; 1978.2516, MNHN; 1887.0391, MNHN; 0000.3686, MNHN; 1980.1115, MNHN                  | 5 | 99      |
| <i>Micrurus corallinus</i>       | Non-aquatic | 1883.0260, MNHN; 1962.0468, MNHN; 1962.0469, MNHN; 0000.7653, MNHN; 0000.3909, MNHN                  | 5 | 100     |
| <i>Naja haje</i>                 | Non-aquatic | 1999.8836, MNHN; 1990.4629, MNHN; 1990.4660, MNHN; 1988.2485, MNHN; 1988.2486, MNHN; 1988.3931, MNHN | 6 | 101,102 |
| <i>Philodryas nattereri</i>      | Non-aquatic | 1908.0245, MNHN; 1967.0136, MNHN; 1967.0133, MNHN; 1967.0134, MNHN; 0000.3744, MNHN                  | 5 | 103     |
| <i>Prosymna meleagris</i>        | Non-aquatic | 0000.8807, MNHN; 1916.0176, MNHN; 1962.0007, MNHN; 1977.0380, MNHN; 1908.0062, MNHN                  | 5 | 104     |
| <i>Psammophis sibilans</i>       | Non-aquatic | 1921.0471, MNHN; 1921.0470, MNHN; 1905.0215, MNHN; 1891.0184, MNHN; 1902.0014, MNHN                  | 5 | 105     |
| <i>Pseudaspis cana</i>           | Non-aquatic | 1912.0494, MNHN; 0000.3529, MNHN; 0000.8592, MNHN; 1896.0391, MNHN; 2007.2457, MNHN                  | 5 | 106,107 |
| <i>Pseudechis porphyriacus</i>   | Non-aquatic | 0000.7672, MNHN; 0000.7673, MNHN; 0000.7674, MNHN; 0000.3945, MNHN; 2007.2453, MNHN                  | 5 | 108     |
| <i>Pseudonaja textilis</i>       | Non-aquatic | 1900.0521, MNHN; 1900.0522, MNHN; 0000.1027, MNHN; 2007.2479, MNHN; 0000.1303, MNHN                  | 5 | 109     |
| <i>Sibynophis collaris</i>       | Non-aquatic | 1919.0144, MNHN; 1919.0145, MNHN; 1946.0285, MNHN; 1928.0055, MNHN; 1928.0053, MNHN                  | 5 | 110,111 |
| <i>Storeria dekayi</i>           | Non-aquatic | 0000.3439, MNHN; 1994.0077, MNHN; 1994.0765, MNHN; 0000.1326, MNHN; 0000.1023, MNHN                  | 5 | 112     |
| <i>Tachymenis peruviana</i>      | Non-aquatic | 0000.3907, MNHN; 1961.0575, MNHN; 1961.0576, MNHN; 1905.0350, MNHN; 1996.2732, MNHN                  | 5 | 113     |
| <i>Thamnophis scaliger</i>       | Non-aquatic | 1975.0190, MNHN; 1901.0305, MNHN; 1894.0081, MNHN; 1901.0306, MNHN; R88724, AMNH                     | 5 | 114     |
| <i>Uropeltis ceylanicus</i>      | Non-aquatic | 1895.0099, MNHN; 1895.0100, MNHN; 1848.0265, MNHN; 1848.0266, MNHN; 1897.0258, MNHN                  | 5 | 115     |

## References:

1. Glodek GS, Voris HK. Marine Snake Diets : Prey Composition , Diversity and Overlap. *Copeia*. 1982;1982(3):661–6.
2. Voris HK, Glodek GS. Habitat, Diet, and Reproduction of the File Snake, *Acrochordus granulatus*, in the Straits of Malacca. *J Herpetol*. 1980;14(1):105–8.
3. Lillywhite HB. Husbandry of the little file snake, *Acrochordus granulatus*. *Zoo Biol*. 1996;15(3):315–27.
4. Lillywhite HB. File snakes (Acrochordidae). In: Hutchins M, Murphy JB, Schlager N, editors. *Grzimek's Animal Life Encyclopedia*, 2nd Edition, Volume 7, Reptiles. Farmington Hills, MI: Gale Group; 2003. p. 439–44.
5. Dowling HG. The curious feeding habits of the Java Wart Snake. *Anim Kingdom*. 1960;63:13–5.
6. Boo-Liat L. Notes on the elephant's trunk snake and the puff-faced water snake in Kuala Lumpur. *Malayan Nat J*. 1964;18:179–83.
7. Pacini N, Harper DM. Tropical Stream Ecology [Internet]. *Tropical Stream Ecology*. Elsevier; 2008 [cited 2014 Oct 20]. 147-197 p. Available from: <http://www.sciencedirect.com/science/article/pii/B978012088449050008X>
8. Chippaux J-P. Les serpents d'Afrique occidentale et centrale. *Faune et Flore Tropicales*. 2006. 1-300 p.
9. Vincent SE, Herrel A, Irschick DJ. Sexual dimorphism in head shape and diet in the cottonmouth snake (*Agkistrodon piscivorus*). *J Zool*. 2004 Sep;264(1):53–9.
10. Lillywhite HB, McCleary RJR. Trophic Ecology of Insular Cottonmouth Snakes: Review and Perspective. *South Am J Herpetol*. 2008;3(2):175–85.
11. Mitchell J. *The Reptiles of Virginia*. Washington and London: Smithsonian Institution Press; 1994.
12. Mitchell J. Snakes. *Biol Dig*. 1991;52(6):17–22.
13. Heatwole H. *Sea Snakes*. Sydney, Australia: University of New South Wales Press Ltd; 1999. 148 p.
14. De Silva A. *Atretium schistosum*. The IUCN Red List of Threatened Species. Version 2014.2. 2010.
15. Daniels RRJ. *Amphibians of Peninsular India*. Press U, editor. Orient Blackswa; 2004. 284 p.
16. Somaweera R. Sri Lankan Colubrid Snakes. *Sri Lanka Nat*. 2004;5:32–46.
17. Murphy JC. *Homalopsid snakes. Evolution in the mud*. Malabar, Florida: Krieger Publishing Company; 2007.
18. Boulenger GA. *Reptilia and Batrachia. The Fauna of British India, including Ceylon and Burma*. Kessinger Publishing, LLC; 1890. 564 p.
19. Jayne BC, Ward TJ, Voris HK. Morphology, reproduction, and diet of the marine homalopsine snake *Bitia hydroides* in Peninsular Malaysia. *Copeia*. 1995;1995(4):800–8.
20. Cantor T. *Catalogue of reptiles inhabiting the Malayan peninsula and islands*. Calcutta: Printed by J. Thomas; 1847. 182 p.
21. Voris HK, Murphy JC. The prey and predators of Homalopsine snakes. *J Nat Hist*. 2002;36(13):1621–32.
22. Auffenberg W. The Herpetofauna of Komodo, with notes on adjacent areas. *Bull Florida State Museum, Biol Sci*. 1980;25(2):40–156.
23. Jayne BC, Voris HK, Heang KB. Diet, feeding behavior, growth and numbers of a population of *Cerberus rynchops* (Serpentes: Homalopsinae) in Malaysia. *Fieldiana Zoology*. Chicago: Field Museum of Natural History; 1988. 36 p.
24. O'Shea M, Halliday T. *Reptiles and amphibians*. Dorling Kindersley Ltd; 2001. 256 p.
25. Kupfer A, Gower DJ, Himstedt W. Field observations on the predation of the caecilian amphibian, genus *Ichthyophis* (Fitzinger, 1826), by the red-tailed pipe snake *Cylindrophis ruffus* (Laurenti, 1768). *Amphibia-Reptilia*. 2003;24(June 2001):212–5.
26. Saint Girons H. *Les serpents du Cambodge*. Muséum Nat. 1972. 170 p.
27. Mori A. Prey-Handling Behavior of Three Species of Homalopsine Snakes: Features Associated with Piscivory and

- Duvernoy's Glands. *J Herpetol.* 1998;32(1):40–50.
28. Pope CH. Notes on Reptiles from Fukien and other Chinese Provinces. *American Museum of Natural History*; 1929. 153 p.
  29. Pope CH. The Reptiles of China. (Scientific Books: Natural History of Central Asia, Vol. X, the Reptiles of China). *Science* (80- ). 1935;82:303–4.
  30. Karns DR, Murphy JC, Voris HK, Suddeth JS. Comparison of Semi-aquatic Snake Communities Associated with the Khorat Basin , Thailand. *Nat Hist J Chulalongkorn Univ.* 2005;5(October):73–90.
  31. Murphy JC, Voris HK, Karns DR, Chan-ard T, Suvunrat K. The Ecology of the Water Snakes of Ban Tha Hin, Songkhla Province, Thailand. *Nat Hist Bull Siam Soc.* 1999;47(2):129–47.
  32. Voris HK, Voris HH. Feeding Strategies in Marine Snakes: An Analysis of Evolutionary, Morphological, Behavioral and Ecological Relationships. *Am Zool.* 1983;23(2):411–25.
  33. Tomascik T, Mah AJ, Nontji A, Mossa MK. The ecology of the Indonesian seas. Oxford University Press; 1997. 656 p.
  34. Shaw CE. Tentacled fishing snake. *ZooNooz.* 1965;38:3–5.
  35. Starace F. Guide des serpents et amphibènes de Guyane. *Ibis Rouge.* 1998. 452 p.
  36. Haltom WL. Alabama reptiles, (Alabama museum of natural history. Museum paper). University. 1931. 145 p.
  37. Cochran TT. A Review and Synthesis of Existing Literature on Rainbow Snakes, *Farancia erytrogramma*. *Bull Chicago Herpetol Soc.* 2011;46(12):157–61.
  38. Richmond ND. The habits of the rainbow snake in Virginia. *Copeia.* 1945;1945(1):28–30.
  39. Günther ACLG. The Reptiles of British India. Ray Societ. Hardwicke R, editor. London; 1864. 540 p.
  40. Gow G. Graeme Gow's Complete Guide to Australian Snakes. Harpercollins; 1991. 181 p.
  41. Karns DR, Voris HK, Goodwin TG. Ecology of oriental-australian rear-fanged water snakes (Colubridae: Homalopsinae) in the Paris Ris Park Mangrove Forest, Singapore. *Raffles Bull Zool.* 2002;50(2):487–98.
  42. Jayne BC, Voris HK, Ng PKL. Snake circumvents constraints on prey size. *Nature.* 2002;418(6894):143.
  43. Pauwels OSG, Lenglet G, Trape J-F, Dubois A. *Grayia smithii* (Leach, 1818). Smith's African Water Snake. *Diet. African Herp News.* 2000;31 October:7–9.
  44. Marques OA V., Sazima I. Historia natural dos repteis da Estacao Ecologica Jureia-Itatins. In: Estacao Ecologica Jureia-Itatins: ambiente físico, flora e fauna. Holos, Edi. 2004. p. 257–77.
  45. Berry PY, Lim GS. The breeding pattern of the puff-faced water snake, *Homalopsis buccata* (Boulenger). *Copeia.* 1967;1967:307–13.
  46. van Hoesel JKP. *Ophidia Javanica*. Bogor, Indonesia: Museum Zoologicum Bogoriense; 1959.
  47. Tweedie MWF. The snakes of Malaya. Singapore: Government Printing Office; 1953. 139 p.
  48. Ehmann H. Reptiles. In: *Encyclopedia of Australian animals*. Angus & Ro. Pymble, N. S. W.; 1992.
  49. Guinea ML, McGrath P, Love B. Observations of the Port Darwin Sea Snake *Hydrelaps darwiniensis*. *Northern Territ Nat.* 1993;14:28–30.
  50. Murphy JB, Schlager N. *Grzimek's Animal Life Encyclopedia*. 2003.
  51. Kropach CN. The yellow-bellied sea snake, *Pelamis*, in the eastern Pacific. In: Dunson WA, editor. *The biology of sea snakes*. Baltimore: University Park Press; 1975. p. 185–213.
  52. Karthikeyan R, Balasubramanian T. Species diversity of sea snakes (Hydrophiidae) distributed in the Coramantal Coast (East coast of India). *Int J Zool Res.* 2007;3(3):107–31.
  53. Gorman GP, Licht P, McCollum F. Annual Reproductive Patterns in Three Species of Marine Snakes from the Central Philippines. *J Herpetol.* 1981;15(3):335–54.
  54. Shine R, Reed RN, Shetty S, Cogger HG. Relationships between sexual dimorphism and niche partitioning within a

- clade of sea-snakes (Laticaudinae). *Oecologia*. 2002;133(2002):45–53.
55. Ineich I, Bonnet X, Brischoux F, Kulbicki M, Seret B, Shine R. Anguilliform fishes and sea kraits: neglected predators in coral-reef ecosystems. *Mar Biol*. 2007;51(2):793–802.
  56. Haagner G V., Branch WR. A taxonomic revision of the dusky-bellied water snake, *Lycodonomorphus laevis* Serpentes: Colubridae. *J African Zool*. 1994;237–50.
  57. Taylor P. An observation on the feeding habits of *Lycodonomorphus rufulus*. *J Herpetol Assoc Africa*. 1970;6(1).
  58. Razzetti E, Msuya CA. Field Guide to the amphibians and reptiles of Arusha National Park (Tanzania). Varese, Italy: Edizioni Negri and Istituto OIKOS; 2002. 84 p.
  59. Rödel M-O, Spawls S. *Natriciteres olivacea*. IUCN Red List Threat Species Version 20142. 2010;
  60. Filippi E, Capula M, Luiselli L, Agrimi U. The prey spectrum of *Natrix natrix* ( LINNAEUS , 1758 ) and *Natrix tessellata* ( LAURENTI , 1768 ) in sympatric populations. *Herpetozoa*. 1996;8(3/4):155–64.
  61. Luiselli L, Capizzi D, Filippi E, Anibaldi C, Rugiero L, Capula M. Comparative Diets of Three Populations of an Aquatic Snake (*Natrix tessellata*, Colubridae) from Mediterranean Streams with Different Hydric Regimes. *Copeia*. 2007;2007(2):426–35.
  62. Gibbons JW, Dorcas ME. *North American Watersnakes, A Natural History*. Animal Nat. University of Oklahoma Press; 2004. 496 p.
  63. Kofron CP. Foods and Habitats of Aquatic Snakes (Reptilia, Serpentes) in a Louisiana Swamp. *J Herpetol*. 1978;12(4):543–54.
  64. Rose F. Aspects of the biology of the Concho watersnake (*Nerodia harteri paucimaculata*). *Texas J Sci*. 1989;41:115–30.
  65. Dorcas ME, Mendelson JR. Distributional notes on *Nerodia harteri harteri* in Parker and Palo Pinto counties, Texas. *Herpetol Rev*. 1991;22:117–8.
  66. Green BD, Dixon JR, Mueller JM, Whiting MJ, Thornton OWJ. Feeding ecology of the Concho water snake, *Nerodia harteri paucimaculata*. *J Herpetol*. 1994;28:165–72.
  67. Ernst CH, Ernst, Evelyn M. *Snakes of the United States and Canada*. Smithsonian Books; 2003. 680 p.
  68. Wang Y, Lau M. *Opisthotropis lateralis*. IUCN Red List Threat Species 2012 eT192152A2047730. 2012;
  69. Carvalho MA, Nogueira F. Serpentes da área urbana de Cuiabá, Mato Grosso: aspectos ecológicos e acidentes ofídicos associados. *Cad Saude Publica*. 1998;14(4):753–63.
  70. Shine R. Strangers in a strange land: ecology of the Australian colubrid snakes. *Copeia*. 1991;1991:120–31.
  71. Hall RJ. Ecological observations on Graham's water snake, *Regina grahami* (Baird and Girard). *Am Midl Nat*. 1969;81(1):156–63.
  72. Godley JS, McDiarmid RW, Rojas NN. Estimating prey size and number in crayfish-eating snakes, Genus *Regina*. *Herpetologica*. 1984;40(1):82–8.
  73. Branson BA, Baker EC. An ecological study of the Queen Snake, *Regina septemvittata* (Say), in Kentucky. *Tulane Stud Zool Bot*. 1974;18:153–71.
  74. Wood JT. Observations on *Natrix Septemvittata* (say) in Southwestern Ohio. *Am Midl Nat*. 1949;42(3):744–50.
  75. Dwyer C, Kaiser H. Relationship between skull form and prey selection in the thamnophiine snake genera *Nerodia* and *Regina*. *J Herpetol*. 1997;31:463–75.
  76. Franz R. Observations on the food, feeding behavior, and parasites of the striped swamp snake, *Regina alleni*. *Herpetologica*. 1977;33:91–4.
  77. Godley JS. Foraging ecology of the striped swamp snake, *Regina alleni*, in southern Florida. *Ecol Monogr*. 1980;50(4):411–36.
  78. Durso AM, Willson JD, Winne CT. Habitat influences diet overlap in aquatic snake assemblages. *J Zool*. 2013;291(3):185–93.



79. Palmer WM, Paul JR. The Black Swamp Snake, *Seminatrix pygaea paludis* Dowling, in North Carolina. *Herpetologica*. 1963;19(3):219–21.
80. Mao J-J. Population ecology of the genus *Sinonatrix* in Taiwan. Trier; 2003.
81. Rossman DA, Ford NB, Seigel RA. The Garter Snakes: Evolution and Ecology. *Animal Nat*. University of Oklahoma Press; 1996. 336 p.
82. Fitch HS. A biogeographical study of the ordinoides artenkreis of garter snakes (genus *Thamnophis*). Berkley an. University of California publications in zoology; 1940. 149 p.
83. Fitch HS. The feeding habits of California garter snakes. *Calif Fish Game*. 1941;27:2–32.
84. Fox WR. Relationships Among the Garter Snakes of the *Thamnophis Elegans* Rassenkreis. University of California Press; 1951. 485-529 p.
85. Lind AJ, Welsh HHJ. Ontogenetic changes in foraging behaviour and habitat use by the Oregon garter snake , *Thamnophis atratus hydrophilus*. *Anim Behav*. 1994;48:1261–73.
86. Fitch HS. Study of Snake Populations in Central California. *Am Midl Nat*. 1949;41(4):513–79.
87. Fleharty L. Comparative ecology of *Thamnophis elegans*, *T. cyrtopsis* and *T. rufipunctatus* in New Mexico. *Southwest Nat*. 1967;12:207–30.
88. Rosen PC, Schwalbe CR. Status of the Mexican and narrow-headed gartersnakes (*Thamnophis eques megalops* and *Thamnophis rufipunctatus rufipunctatus*) in Arizona. Albuquerque, New Mexico; 1988.
89. Stebbins RC. A Field Guide to Western Reptiles and Amphibians. Peterson F. Boston, Massachusetts: Houghton Mifflin Harcourt; 2003. 560 p.
90. Das I. A Photographic Guide to Snakes and Other Reptiles of India. London, United Kingdom: New Holland Publishers Ltd; 2002. 144 p.
91. De Silva A, Das I. A Photographic Guide To Snakes & Other Reptiles Of Sri Lanka. Photograph. New Holland Publishers Ltd; 2004. 144 p.
92. Zhao E. Snakes of China. Anhui Science and Technology Press; 2006.
93. McKnight DT, Harmon JR, McKnight JL, Ligon DB. Notes on the diets of seven sympatric snakes in the genera *Agkistrodon*, *Nerodia*, *Sistrurus*, and *Thamnophis*. *Herpetol Notes*. 2014;7(September 2015):171–7.
94. Luiselli L, Akani GC. An investigation into the composition , complexity and functioning of snake communities in the mangroves of. 2002;40:220–7.
95. Wall F. *Ophidia taprobanica*; or, The snakes of Ceylon. Colombo, Sri Lanka: H.R. Cottle; 1921. 638 p.
96. Mendelson JR, Adams A. *Diadophis punctatus* ( Ring-necked Snake ). Diet. *Herpetol Rev*. 2014;45(4):709–10.
97. Shine R. Ecology of the Australian Elapid Snake *Echiopsis curta*. *J Herpetol*. 1982;16(4):388–93.
98. Donato CR, Dantas MAT, Da Rocha PA. *Epicrates cenchria* (Rainbow Boa). Diet and foraging behavior. *Herpetol Rev*. 2012;43(2):1–2.
99. Silva D, Vallim de Gouveia R, Trindade I, Novelli I. *Erythrolamprus aesculapii* (false coral). Diet. *Herpetol Rev*. 2013;44(1):154.
100. Marques OA V., Sazima I. Diet and feeding behavior of the Coral snake, *Micrurus corallinus*, from the Atlantic forest of Brazil. *Herpetol Nat Hist*. 1997;5(1):88–93.
101. Masood MF. Ecological distribution of snakes' fauna of Jazan region of Saudi Arabia. *Egypt Acad J Biol Sci*. 2012;4(1):183–97.
102. El-Deib S. Lipid changes in blood serum and tissues of the Egyptian Cobra “*Naja haje haje*” during the hibernation cycle. *J Therm Biol*. 2005;30:51–9.
103. Cesar P, Dourado M, Borges-nojosa DM, Passos DC, Bezerra CH. Ecology of *Philodryas nattereri* in the Brazilian semi-arid region. *Herpetol J*. 2011;21:193–8.
104. Broadley DG. Predation on reptile eggs by African snakes of the genus *Prosymna*. *Herpetologica*. 1979;35(4):338–41.

105. Akani GC, Eniang EA, Ekpo IJ, Angelici FM, Luiselli L. Food Habits of the Snake *Psammophis philipsi* from the Continuous Rain-Forest Region of Southern Nigeria (West Africa). *J Herpetol.* 2003;37(1):208–11.
106. Junker K, Lane EP, Dlamini B, Kotze A, Boomker J. Post mortem identification of *Kalichephalus colubri colubri* (Nematoda: Diaphanocephalidae) in a captive mole snake (*Pseudaspis cana*) in South Africa. *J S Afr Vet Assoc.* 2009;80(1):54–6.
107. Fitzsimons V, Brain CK. A short account of the reptiles of the Kalahari Gemsbok National Park. *Koedoe.* 1958;1(1):99–104.
108. Shine R. The Evolution of Viviparity: Ecological Correlates of Reproductive Mode within a Genus of Australian Snakes (*Pseudechis*: Elapidae). *Copeia.* 1987;1987(3):551–63.
109. Shine R. Constraints , Allometry , and Adaptation : Food Habits and Reproductive Biology of Australian Brownsnakes ( *Pseudonaja* : Elapidae ). *Herpetologica.* 1989;45(2):195–207.
110. Leviton AE. Contributions to a review of Philippine snakes, II: The snakes of the Genera *Liopeltis* and *Sibynophis*. *Philipp J Sci.* 1963;92(3):367–81.
111. Savitzky AH. Coadapted Character Complexes among Snakes : Fossoriality , Piscivory , and Durophagy. *Am Zool.* 1983;23(2):397–409.
112. Judd WW. Observations on the food of the little brownsnakes, *Storeria dekayi*, at London, Ontario. *Copeia.* 1954;1954(1):62–4.
113. Greene HW, Jaksic FM. The feeding behavior and natural history of two Chilean snakes, *Philodryas chamissonis* and *Tachymenis chilensis* (Colubridae). *Rev Chil Hist Nat.* 1992;65:485–93.
114. Reguera S, Santos X, Feriche M, Mocino-Deloya E, Setser K, Pleguezuelos JM. Diet and energetic constraints of an earthworm specialist, the Mesa Central Blotched Garter Snake (*Thamnophis scaliger*). *Can J Zool [Internet].* 2011;89:1178–87. Available from: <http://www.nrcresearchpress.com/doi/abs/10.1139/z11-096>
115. Ganesh SR, Chandramouli SR. Endangered and Enigmatic Reptiles of Western Ghats – An Overview. In: Singaravelan N, editor. *Rare Animals of India.* Bentham Science Publishers; 2013. p. 35–61.

**Supplementary Material 2:** Phylogeny of the selected species based on Pyron et al. 2013 (blue tear drop = 'aquatic' species).

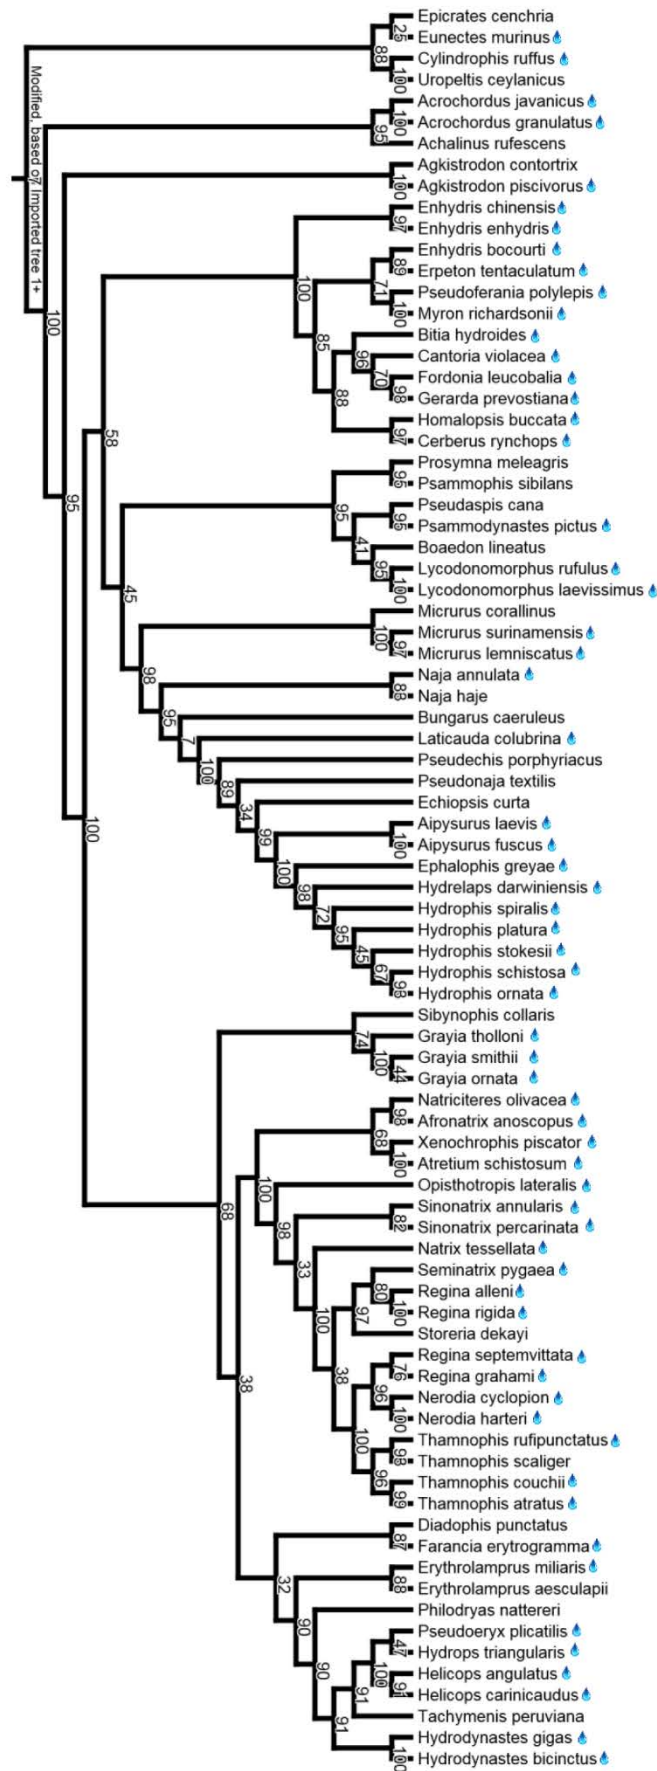

**Supplementary Material 3:** List of anatomical landmarks and curves used for the template.

Anatomical landmarks:

1. Middle of the left nostril
2. Middle of the right nostril
3. Extreme point of the rostrum
4. Extreme point of the left part of the jaw
5. Extreme point of the right part of the jaw
6. Left commissure
7. Right commissure
8. Extremity of the mental scale
9. Most dorsal point of the left eye
10. Most dorsal point of the right eye

Curves:

Curve 1: left eye

Curve 2: right eye

Curve 3: from landmark 6 to landmark 8 along mouth

Curve 4: from landmark 7 to landmark 8 along mouth

Curve 5: from landmark 4 to landmark 5 along dorsal part of the head

Curve 6: from landmark 4 to landmark 5 along ventral part of the head

**Supplementary Material 4:** Assessment of the error in landmark positioning using a principal component analysis. Landmarks were placed ten times on three different specimens of the same species. The principal component plot shows that variation due to the placement of the landmarks is lower than variation among individuals.

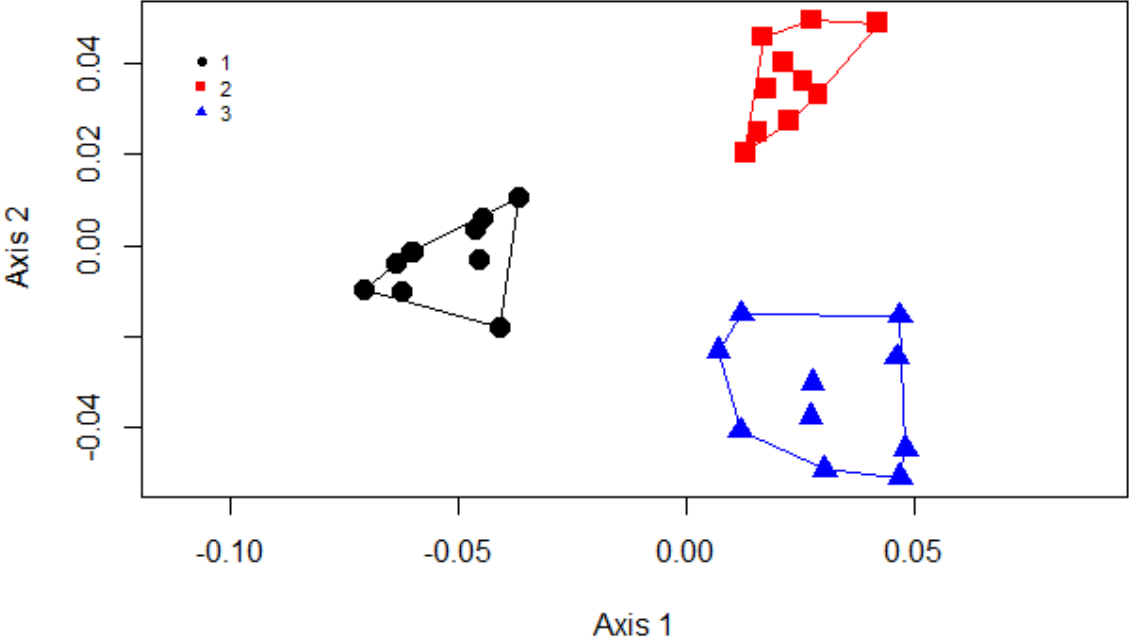

**Supplementary Material 5:** Scatter plot of the principal components two and nine showing that species that capture elusive aquatic prey (black squares) differ from those that do not (grey circles). Axes two and nine respectively account for 13.7 and 1.5% of the head shape variance.

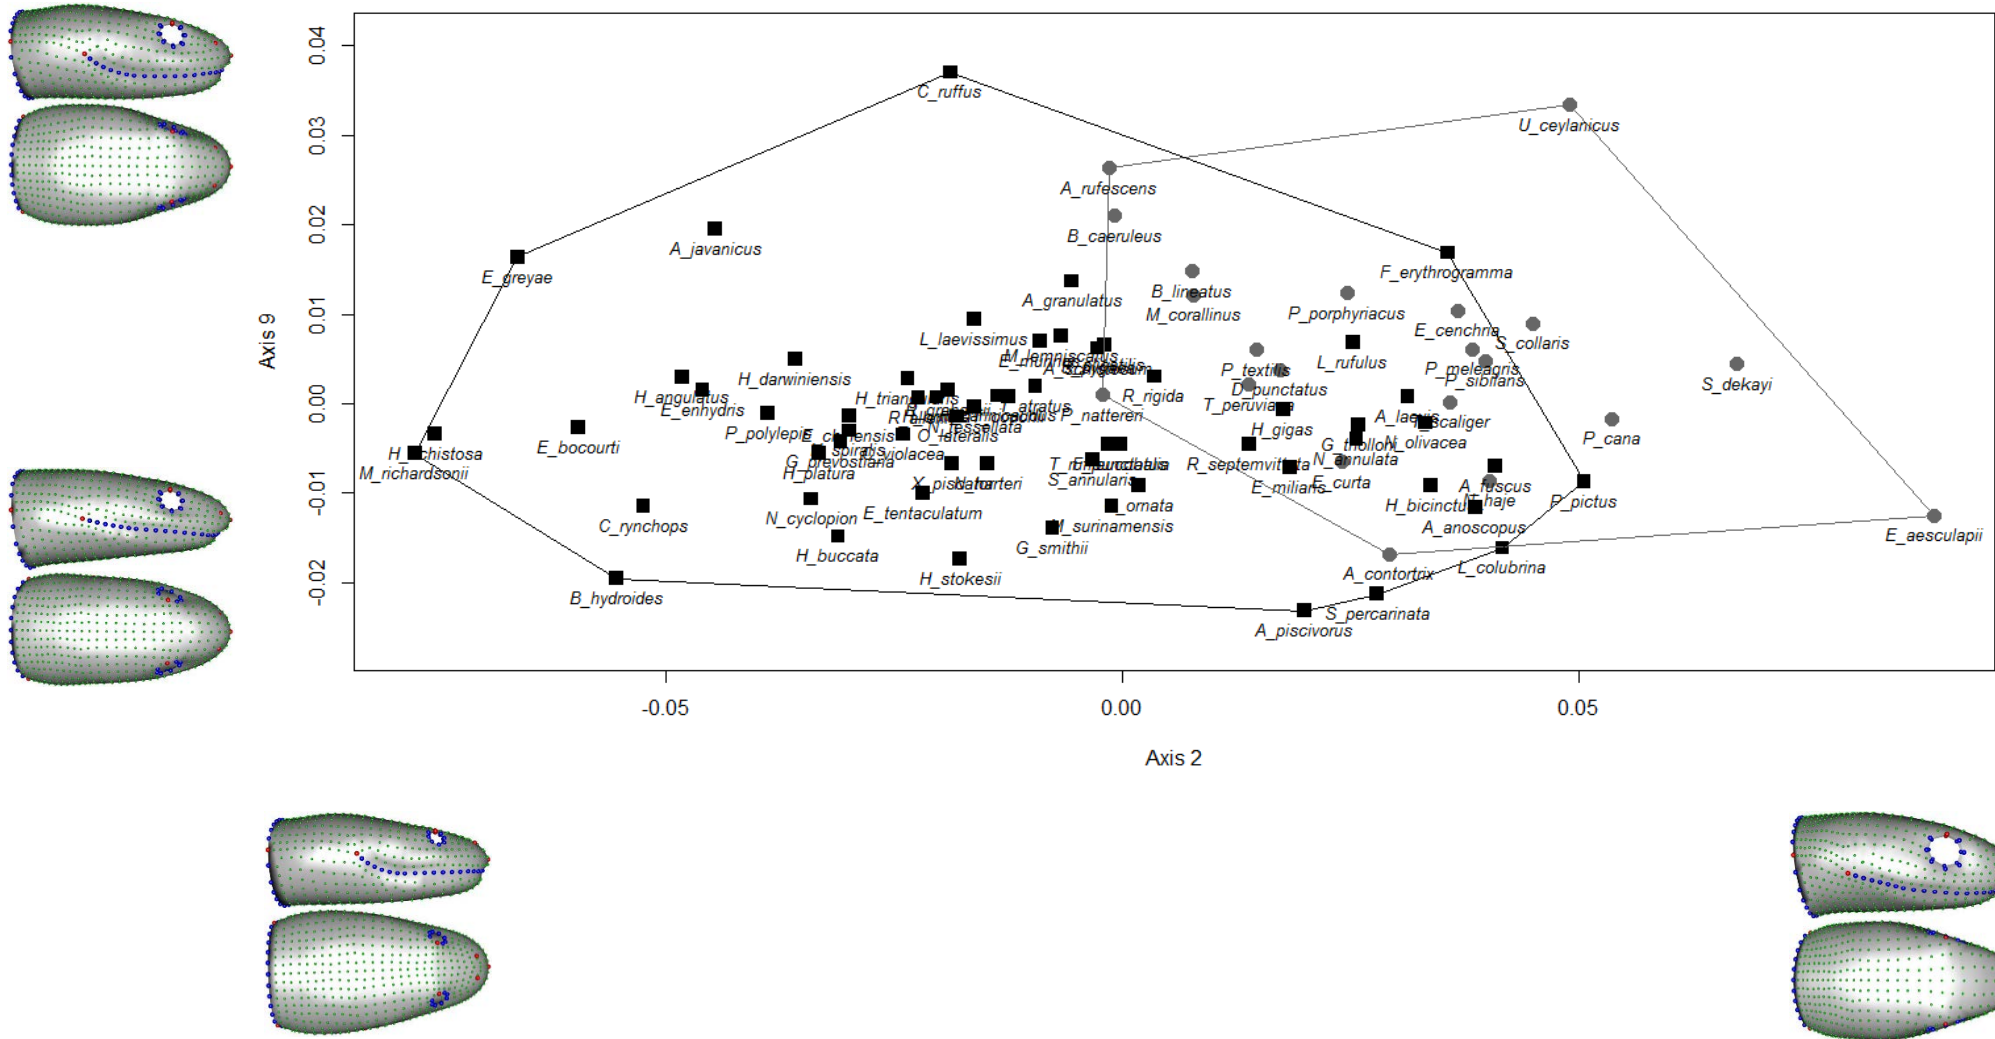

Supplement: rspb20161645supp1.pdf [file rspb20161645supp1.pdf]
